# Supplementary material
Source: Copernicus journal article supplement (doi:10.5194/acp-26-8051-2026)
Supplement: Supplementary file 1 [file acp-26-8051-2026-supplement.pdf]

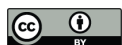

*Supplement of*

## **Observed impacts of aerosol regimes on energy and carbon fluxes in the Amazon forest**

**Mariano A. B. da Rocha et al.**

*Correspondence to:* Cléo Q. Dias-Júnior (cleo.quaresma@ifpa.edu.br)

The copyright of individual parts of the supplement might differ from the article licence.

# Supplementary Material

Table S1: Number of runs (half-hour periods) after applying all filtering procedures (described in section 2.2) during the dry season.

| Variables                           | 10:00 – 14:00 LT |             |       | 07:00 – 17:00 LT |             |       |
|-------------------------------------|------------------|-------------|-------|------------------|-------------|-------|
|                                     | N. Clean         | N. Polluted | Total | N. Clean         | N. Polluted | Total |
| $SW_{in}$ ( $Wm^{-2}$ )             | 301              | 204         | 505   | 736              | 459         | 1195  |
| $SW_{out}$ ( $Wm^{-2}$ )            | 301              | 204         | 505   | 736              | 459         | 1195  |
| $LW_{atm}$ ( $Wm^{-2}$ )            | 301              | 200         | 501   | 733              | 453         | 1186  |
| $LW_{terr}$ ( $Wm^{-2}$ )           | 301              | 204         | 505   | 735              | 459         | 1194  |
| $R_n$ ( $Wm^{-2}$ )                 | 301              | 200         | 501   | 733              | 453         | 1186  |
| $H$ ( $Wm^{-2}$ )                   | 197              | 192         | 389   | 455              | 389         | 844   |
| $LE$ ( $Wm^{-2}$ )                  | 183              | 180         | 363   | 447              | 386         | 833   |
| $FCO_2$ ( $\mu mol m^{-2} s^{-1}$ ) | 247              | 195         | 442   | 596              | 405         | 1001  |
| $G$ ( $Wm^{-2}$ )                   | 301              | 218         | 519   | 741              | 487         | 1228  |

Table S2: Number of runs (half-hour periods) after applying all filtering procedures (described in section 2.2) reported by year for the dry season, within the 07:00–17:00 LT time window.

| Year  | $SW_{in}$ |      | $SW_{out}$ |      | $LW_{atm}$ |      | $LW_{terr}$ |      | $R_n$ |      | $H$ |      | $LE$ |      | $FCO_2$ |      | $G$  |      |
|-------|-----------|------|------------|------|------------|------|-------------|------|-------|------|-----|------|------|------|---------|------|------|------|
|       | N         | %    | N          | %    | N          | %    | N           | %    | N     | %    | N   | %    | N    | %    | N       | %    | N    | %    |
| 2016  | 169       | 14.1 | 169        | 14.1 | 169        | 14.2 | 169         | 14.2 | 169   | 14.2 | 157 | 18.6 | 146  | 17.5 | 160     | 16.0 | 174  | 14.2 |
| 2017  | 180       | 15.1 | 180        | 15.1 | 180        | 15.2 | 180         | 15.1 | 180   | 15.2 | 2   | 0.2  | 2    | 0.2  | 176     | 17.6 | 191  | 15.6 |
| 2018  | 67        | 5.6  | 67         | 5.6  | 67         | 5.6  | 66          | 5.5  | 67    | 5.6  | 57  | 6.8  | 59   | 7.1  | 55      | 5.5  | 69   | 5.6  |
| 2019  | 117       | 9.8  | 117        | 9.8  | 117        | 9.9  | 117         | 9.8  | 117   | 9.9  | 70  | 8.3  | 71   | 8.5  | 67      | 6.7  | 114  | 9.3  |
| 2020  | 205       | 17.2 | 205        | 17.2 | 205        | 17.3 | 205         | 17.2 | 205   | 17.3 | 199 | 23.6 | 195  | 23.4 | 195     | 19.5 | 205  | 16.7 |
| 2021  | 167       | 14.0 | 167        | 14.0 | 158        | 13.3 | 167         | 14.0 | 158   | 13.3 | 91  | 10.8 | 90   | 10.8 | 85      | 8.5  | 160  | 13.0 |
| 2022  | 290       | 24.3 | 290        | 24.3 | 290        | 24.5 | 290         | 24.3 | 290   | 24.5 | 268 | 31.8 | 270  | 32.4 | 263     | 26.3 | 315  | 25.7 |
| Total | 1195      | 100  | 1195       | 100  | 1186       | 100  | 1194        | 100  | 1186  | 100  | 844 | 100  | 833  | 100  | 1001    | 100  | 1228 | 100  |

Table S3: Mann-Whitney U test results for different aerosol regime classifications. \* \* \* ( $p < 0.001$ ), \*\* ( $p < 0.01$ ), \* ( $p < 0.05$ ), and ns (not significant).

| Main Stage - Percentil 10 (AOD $\leq 0.13$ ), Percentil 90 (AOD $\geq 0.40$ )        |            |               |             |               |                  |                |                |             |         |
|--------------------------------------------------------------------------------------|------------|---------------|-------------|---------------|------------------|----------------|----------------|-------------|---------|
| Variable                                                                             | N<br>Clean | Mean<br>Clean | SD<br>Clean | N<br>Polluted | Mean<br>Polluted | SD<br>Polluted | U<br>Statistic | p-<br>value | Signif. |
| <i>SWin</i> ( $Wm^{-2}$ )                                                            | 301        | 836.5         | 165.2       | 204           | 813.5            | 124.4          | 35391          | 0.004       | **      |
| <i>SWout</i> ( $Wm^{-2}$ )                                                           | 301        | 92.8          | 19.7        | 204           | 95.9             | 15.1           | 27859          | 0.077       | ns      |
| <i>LWatm</i> ( $Wm^{-2}$ )                                                           | 301        | 431.5         | 10.4        | 200           | 432.1            | 9.4            | 29439          | 0.677       | ns      |
| <i>LWterr</i> ( $Wm^{-2}$ )                                                          | 301        | 484.7         | 14.0        | 204           | 483.6            | 10.8           | 34148          | 0.032       | *       |
| <i>R<sub>n</sub></i> ( $Wm^{-2}$ )                                                   | 301        | 659.3         | 137.8       | 200           | 632.8            | 100.8          | 35671          | 0.000       | ***     |
| <i>H</i> ( $Wm^{-2}$ )                                                               | 197        | 160.6         | 67.8        | 192           | 138.9            | 61.4           | 22611          | 0.001       | ***     |
| <i>LE</i> ( $Wm^{-2}$ )                                                              | 183        | 426.7         | 136.8       | 180           | 417.8            | 146.7          | 17246          | 0.438       | ns      |
| <i>FCO<sub>2</sub></i> ( $\mu molm^{-2}s^{-1}$ )                                     | 247        | -12.5         | 8.0         | 195           | -17.4            | 8.6            | 32125          | 0.000       | ***     |
| <i>G</i> ( $Wm^{-2}$ )                                                               | 301        | 1.8           | 1.6         | 218           | 0.8              | 1.4            | 43719          | 0.000       | ***     |
| Wide Stage - Percentil 15 (AOD $\leq 0.14$ ), Percentil 85 (AOD $\geq 0.36$ )        |            |               |             |               |                  |                |                |             |         |
| <i>SWin</i> ( $Wm^{-2}$ )                                                            | 423        | 829.1         | 166.2       | 272           | 816.6            | 131.5          | 62510          | 0.054       | ns      |
| <i>SWout</i> ( $Wm^{-2}$ )                                                           | 423        | 91.8          | 20.1        | 272           | 95.7             | 15.6           | 50534          | 0.007       | **      |
| <i>LWatm</i> ( $Wm^{-2}$ )                                                           | 423        | 432.7         | 10.0        | 268           | 433.2            | 9.4            | 55655          | 0.688       | ns      |
| <i>LWterr</i> ( $Wm^{-2}$ )                                                          | 423        | 484.1         | 14.5        | 272           | 484.5            | 11.0           | 59785          | 0.382       | ns      |
| <i>R<sub>n</sub></i> ( $Wm^{-2}$ )                                                   | 423        | 654.7         | 138.0       | 268           | 634.7            | 107.7          | 64197          | 0.003       | **      |
| <i>H</i> ( $Wm^{-2}$ )                                                               | 281        | 157.5         | 70.0        | 258           | 139.0            | 62.7           | 42045          | 0.001       | **      |
| <i>LE</i> ( $Wm^{-2}$ )                                                              | 265        | 422.3         | 133.9       | 241           | 419.8            | 145.7          | 32675          | 0.651       | ns      |
| <i>FCO<sub>2</sub></i> ( $\mu molm^{-2}s^{-1}$ )                                     | 354        | -12.6         | 8.2         | 263           | -16.7            | 8.5            | 60056          | 0.000       | ***     |
| <i>G</i> ( $Wm^{-2}$ )                                                               | 427        | 1.8           | 1.6         | 298           | 0.9              | 1.4            | 83989          | 0.000       | ***     |
| Alternative Stage - Percentil 20 (AOD $\leq 0.16$ ), Percentil 80 (AOD $\geq 0.32$ ) |            |               |             |               |                  |                |                |             |         |
| <i>SWin</i> ( $Wm^{-2}$ )                                                            | 547        | 822.9         | 172.0       | 372           | 828.2            | 132.4          | 103274         | 0.698       | ns      |
| <i>SWout</i> ( $Wm^{-2}$ )                                                           | 547        | 91.1          | 20.4        | 372           | 96.3             | 15.4           | 85935          | 0.000       | ***     |
| <i>LWatm</i> ( $Wm^{-2}$ )                                                           | 544        | 433.4         | 9.8         | 366           | 433.6            | 9.5            | 98174          | 0.723       | ns      |
| <i>LWterr</i> ( $Wm^{-2}$ )                                                          | 547        | 483.7         | 14.6        | 372           | 485.2            | 11.0           | 100283         | 0.712       | ns      |
| <i>R<sub>n</sub></i> ( $Wm^{-2}$ )                                                   | 544        | 650.5         | 144.8       | 366           | 644.3            | 112.1          | 105788         | 0.109       | ns      |
| <i>H</i> ( $Wm^{-2}$ )                                                               | 377        | 155.9         | 71.0        | 350           | 140.8            | 64.5           | 74993          | 0.001       | **      |
| <i>LE</i> ( $Wm^{-2}$ )                                                              | 355        | 416.4         | 135.7       | 331           | 420.4            | 148.0          | 58402          | 0.893       | ns      |
| <i>FCO<sub>2</sub></i> ( $\mu molm^{-2}s^{-1}$ )                                     | 472        | -12.7         | 8.3         | 364           | -16.0            | 8.5            | 105109         | 0.000       | ***     |
| <i>G</i> ( $Wm^{-2}$ )                                                               | 567        | 1.9           | 1.6         | 411           | 1.0              | 1.5            | 150612         | 0.000       | ***     |

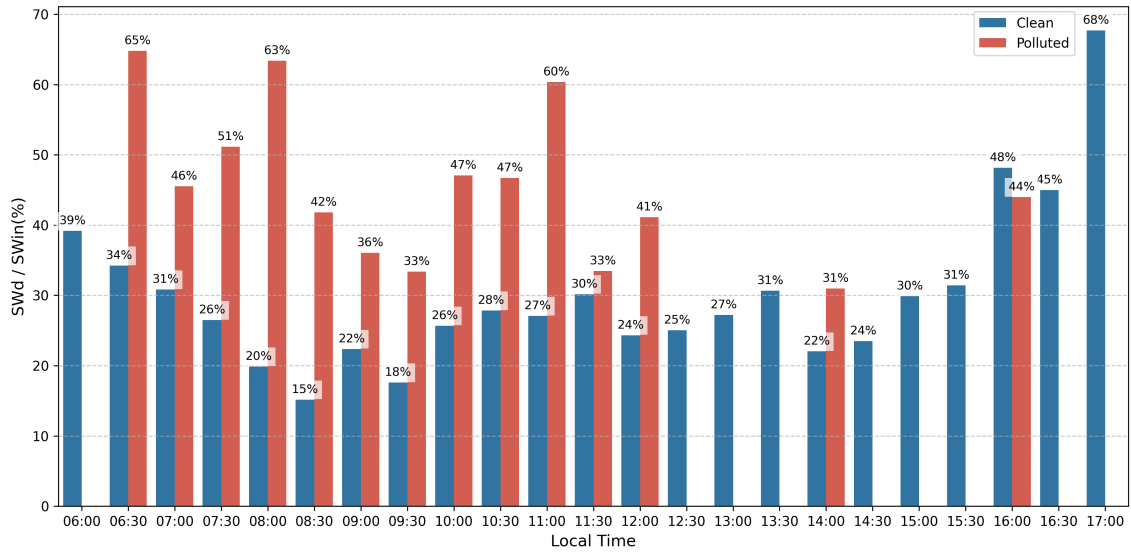

Figure S1: Diffuse radiation fraction ( $F_d = SW_d/SW_{in}$ ) under Clean and Polluted aerosol regimes during 2021 at the ATTO site.  $SW_d$  represents diffuse radiation and  $SW_{in}$  the incoming shortwave radiation.

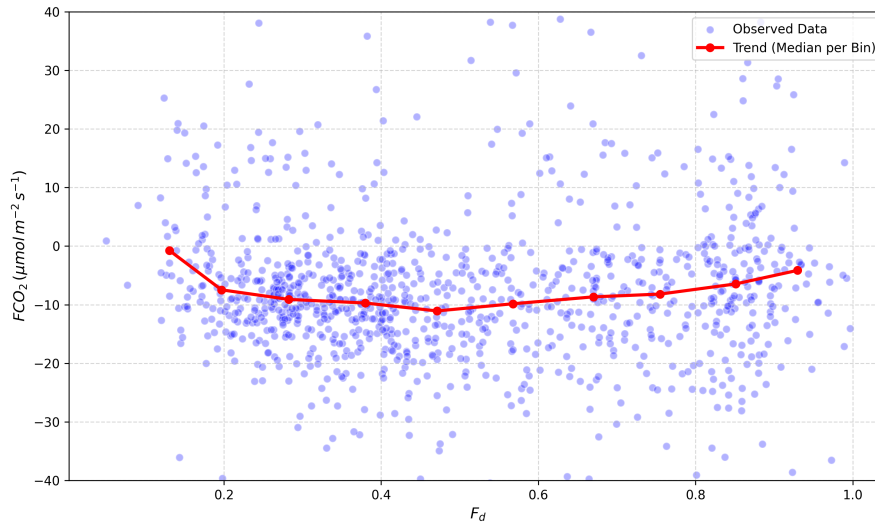

Figure S2: The relationship between  $CO_2$  flux and diffuse radiation fraction ( $F_d = SW_d/SW_{in}$ ) during 2021 at the ATTO site.  $SW_d$  represents diffuse radiation and  $SW_{in}$  the incoming shortwave radiation.

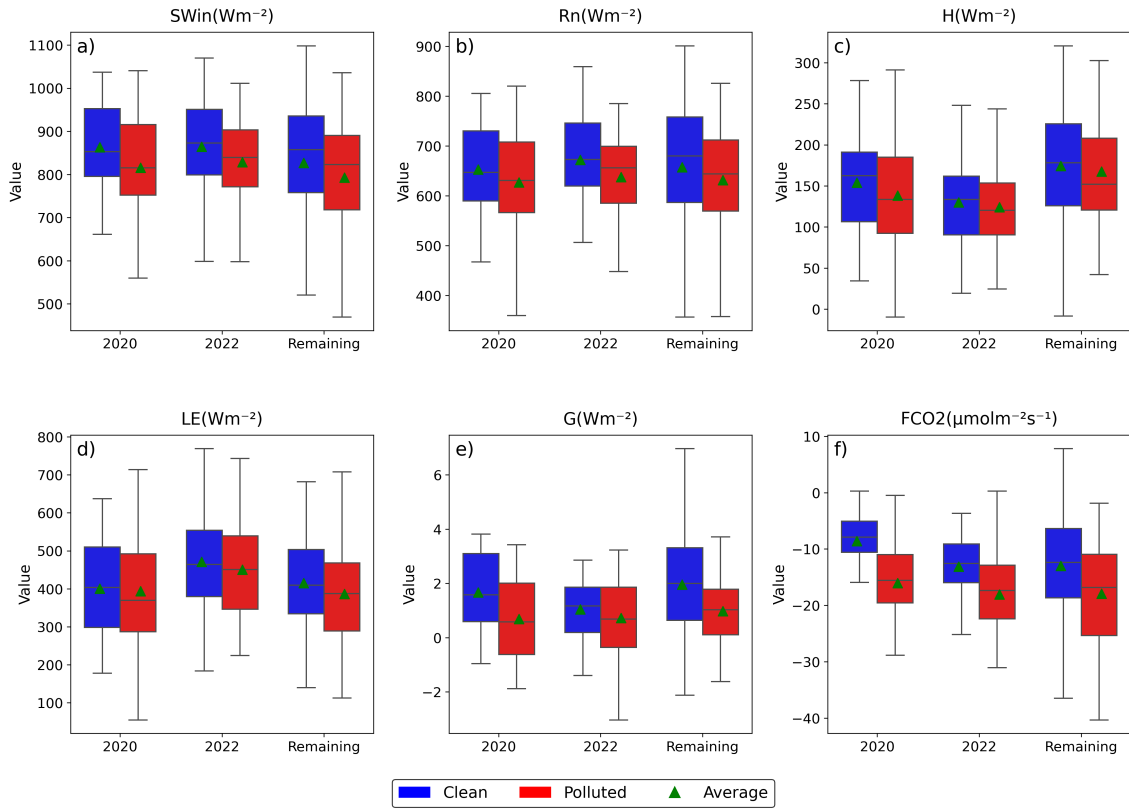

Figure S3: Box plots of a) incoming shortwave radiation ( $SW_{in}$ ), b) net radiation ( $R_n$ ), c) sensible heat flux ( $H$ ), d) latent heat flux ( $LE$ ), e) ground heat flux ( $G$ ), f)  $CO_2$  flux ( $FCO_2$ ). All variables under clean (blue) and polluted (red) aerosol regimes for 2020, 2022, and the remaining years (2016, 2017, 2018, 2019 and 2021), grouped due to limited data availability. Triangles indicate the mean value.
